# Supplementary material
Source: PubMed Central journal article supplement (PMC4787270)
Supplement: NIHMS751848-supplement-Sup1.pdf [file NIHMS751848-supplement-Sup1.pdf]

Supplemental Table S1

Available samples by late GVHD syndrome. Samples include cryopreserved peripheral blood mononuclear cells, heparin plasma, EDTA plasma, serum, and urine

| <b>Table 6.</b> Currently available samples*                                                                                                                  | Patients | Late acute GVHD | Chronic GVHD | Cutaneous sclerosis | Bronchiolitis obliterans syndrome (BOS) | No late GVHD syndrome |
|---------------------------------------------------------------------------------------------------------------------------------------------------------------|----------|-----------------|--------------|---------------------|-----------------------------------------|-----------------------|
| d100 post HCT                                                                                                                                                 | 875      | 80              | 341          | 41                  | 16                                      | 488                   |
| d180 post HCT                                                                                                                                                 | 422      | 18              | 139          | 12                  | 6                                       | 268                   |
| d365 post HCT                                                                                                                                                 | 83       | 1               | 9            | 1                   | 1                                       | 74                    |
| Late GVHD syndrome onset                                                                                                                                      | 283      | 59              | 236          | 17                  | 7                                       | --                    |
| 3mo post onset                                                                                                                                                | 248      | 42              | 208          | 13                  | 11                                      | --                    |
| 6mo post onset                                                                                                                                                | 158      | 27              | 134          | 9                   | 7                                       | --                    |
| * sample categories not mutually exclusive across columns. For example, a chronic GVHD onset sample may be concurrent with a cutaneous sclerosis onset sample |          |                 |              |                     |                                         |                       |
| <b>Abbreviations: HCT: hematopoietic cell transplant; GVHD: graft-versus-host disease</b>                                                                     |          |                 |              |                     |                                         |                       |
